# Supplementary material for: Hydroponic Common-Bean Performance under Reduced N-Supply Level and Rhizobia Application
Source: MDPI journal article supplement (doi:10.3390/plants12030646), 2023-02-01
Supplement: s1 [file s1]

**Table S1. Chemical composition of irrigation water.**

| Parameter                                   | Value       |
|---------------------------------------------|-------------|
| EC                                          | 0.315 ds/m  |
| pH                                          | 7.3         |
| Ca <sup>2+</sup>                            | 1.00 mmol/l |
| Mg <sup>2+</sup>                            | 0.30 mmol/l |
| K <sup>+</sup>                              | 0.00 mmol/l |
| NH <sub>4</sub> <sup>+</sup>                | 0.00 mmol/l |
| Na <sup>+</sup>                             | 0.30 mmol/l |
| SO <sub>4</sub> <sup>2-</sup>               | 0.20 mmol/l |
| NO <sub>3</sub> <sup>-</sup>                | 0.00 mmol/l |
| H <sub>2</sub> PO <sub>4</sub> <sup>-</sup> | 0.00 mmol/l |
| HCO <sub>3</sub> <sup>-</sup>               | 2.20 mmol/l |
| Cl <sup>-</sup>                             | 0.30 mmol/l |
| Fe                                          | 0.00 µmol/l |
| Mn <sup>++</sup>                            | 0.00 µmol/l |
| Zn <sup>++</sup>                            | 2.15 mmol/l |
| Cu <sup>++</sup>                            | 0.00 µmol/l |
| B                                           | 0.00 µmol/l |
| Mo                                          | 0.00 µmol/l |
| Si                                          | 0.00 µmol/l |

Table S2. Nutrient solution recipes

| Information about concentrated stock solutions |                           |            |          |                      |          |          |          |
|------------------------------------------------|---------------------------|------------|----------|----------------------|----------|----------|----------|
| Tanks (n=3)                                    |                           | Volume (L) |          | Concentration factor |          |          |          |
| Tank 1                                         |                           | 20 L       |          | 100                  |          |          |          |
| Tank 2                                         |                           | 20 L       |          | 100                  |          |          |          |
| Nitric acid                                    |                           | 20 L       |          | 100                  |          |          |          |
| NS                                             |                           | 100% N     |          | 75% N                | 50% N    | 25% N    | 100% N   |
| DACE Applied                                   |                           | 0-50       |          | 0-35                 | 0-35     | 35-50    | 50-80    |
| Tank 1<br>Fertilizers                          | Calcium nitrate           | 1.189 kg   | 1.189 kg | 1.189 kg             | 0.677 kg | 1.102 kg | 0.320 kg |
|                                                | Calcium chloride (48% Cl) | 0.000 kg   | 0.333 kg | 0.333 kg             | 0.422 kg | 0.000 kg | 0.564 kg |
|                                                | Potassium nitrate         | 0.288 kg   | 0.261 kg | 0.000 kg             | 0.006 kg | 0.218 kg | 0.000 kg |
|                                                | Ammonium nitrate          | 0.104 kg   | 0.104 kg | 0.104 kg             | 0.000 kg | 0.207 kg | 0.000 kg |
|                                                | Fe- EDDHA (13% Fe)        | 13.00 g    | 13.00 g  | 13.00 g              | 13.00 g  | 13.00 g  | 13.00 g  |
| Tank 2 Fertilizers                             | Potassium nitrate         | 0.770 kg   | 0.403 kg | 0.000 kg             | 0.000 kg | 0.678 kg | 0.000 kg |
|                                                | Magnesium sulphate        | 0.640 kg   | 0.640 kg | 0.640 kg             | 0.640 kg | 0.591 kg | 0.640 kg |
|                                                | Magnesium nitrate         | 0.000 kg   | 0.000 kg | 0.000 kg             | 0.000 kg | 0.000 kg | 0.000 kg |
|                                                | Monopotassium phosphate   | 0.000 kg   | 0.000 kg | 0.000 kg             | 0.000 kg | 0.000 kg | 0.000 kg |
|                                                | Potassium sulphate        | 0.012 kg   | 0.352 kg | 0.924 kg             | 0.918 kg | 0.099 kg | 0.924 kg |
|                                                | Phosphoric acid (85%)     | 0.164 L    | 0.164 L  | 0.164 L              | 0.164 L  | 0.164 L  | 0.164 L  |
|                                                | Ammonium sulphate         | 0.000 kg   | 0.000 kg | 0.000 kg             | 0.000 kg | 0.000 kg | 0.264 kg |
|                                                | Manganese sulphate        | 2.37 g     | 2.37 g   | 2.37 g               | 2.37 g   | 2.37 g   | 2.37 g   |
|                                                | Zinc sulphate             | 1.64 g     | 1.64 g   | 1.64 g               | 1.64 g   | 1.64 g   | 1.64 g   |
|                                                | Copper sulphate           | 0.35 g     | 0.35 g   | 0.35 g               | 0.35 g   | 0.35 g   | 0.35 g   |
|                                                | Boric acid (17% B)        | 2.47 g     | 2.47 g   | 2.47 g               | 2.47 g   | 2.47 g   | 2.47 g   |
|                                                | Sodium molybdate          | 0.24 g     | 0.24 g   | 0.24 g               | 0.24 g   | 0.24 g   | 0.24 g   |
| Tank 3                                         | Nitric acid               | 0.174 L    | 0.174 L  | 0.174 L              | 0.174 L  | 0.174 L  | 0.174 L  |

The above recipes were scheduled based on the chemical composition of irrigation water (Table S1).
